# Supplementary material for: Genetic Risk for Hemochromatosis is Associated with Movement Disorders
Source: bioRxiv or medRxiv preprint supplement (doi:10.1101/2021.08.16.21262117), 2021-08-24
Supplement: Supplementary file [file media-1.pdf]

## Supplementary Materials

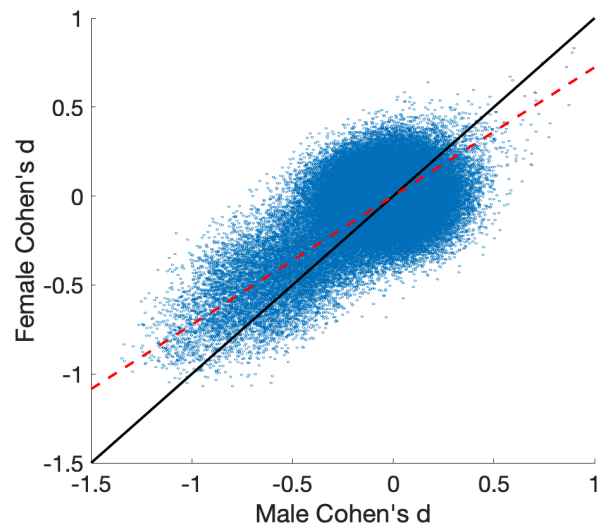

Figure 1 Sex stratified associations of *p.C282Y* homozygosity and T2 voxel intensities (Cohen's *d*), as scatter plot – each line represents a single voxel. Black line indicates  $y=x$  (i.e. equal effect sizes). Red line indicates best fitting line (for points of at least moderate effects  $x^2 + y^2 > 0.2$ ),  $\beta = 0.72$  indicating approximately a 28% reduction in T2 intensity brain associations for females compared to males.

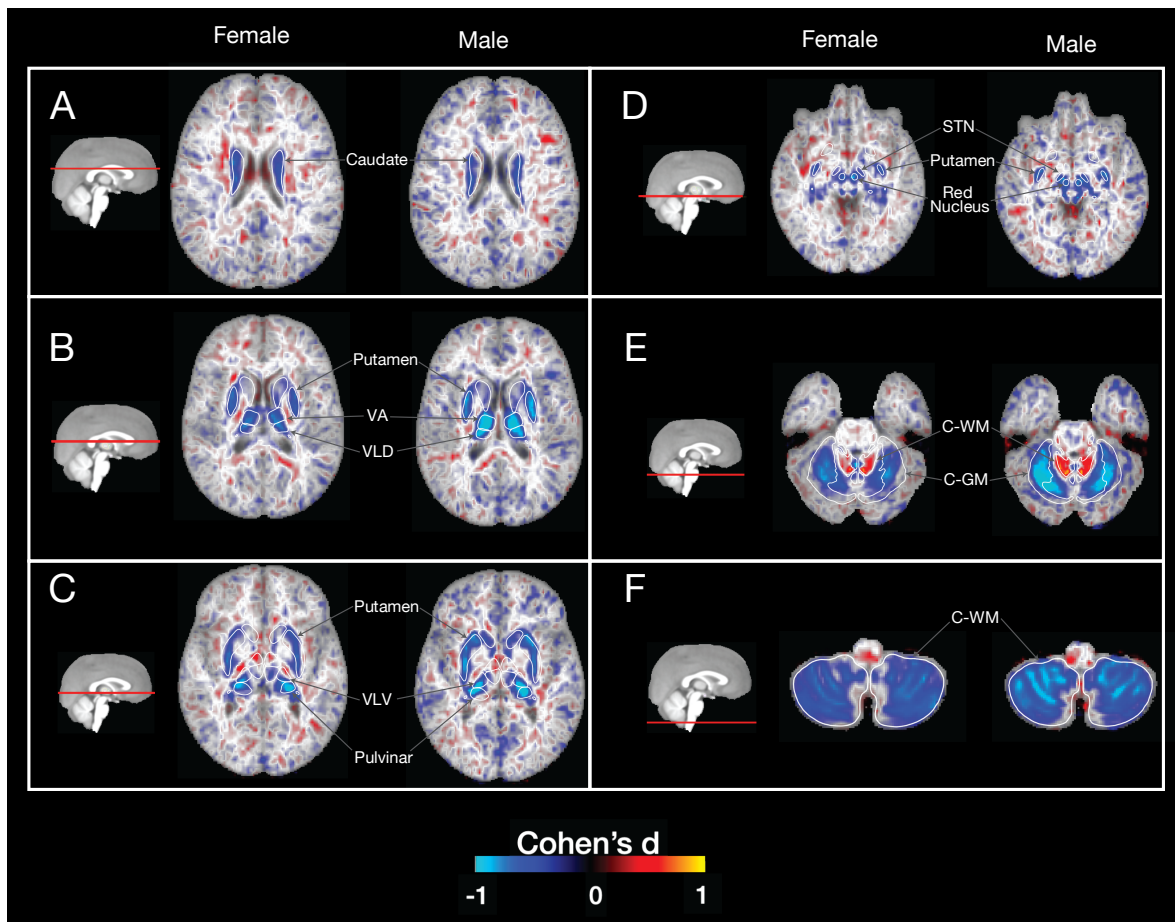

Figure 2 Maps of sex stratified associations of *p.C282Y* homozygosity and T2 voxel intensities (Cohen's *d*). Overall effects are larger in males vs females, with largest effects in males observed in the VA, VLD and pulvinar nuclei of the thalamus (B) as well as in the C-WM and C-GM (E). Abbreviations: VA – ventral anterior, VLD – ventral anterior dorsal, VLV – ventral anterior ventral, C-WM – cerebellum white matter, C-GM – cerebellum GM.

chr6:26093141 A/G

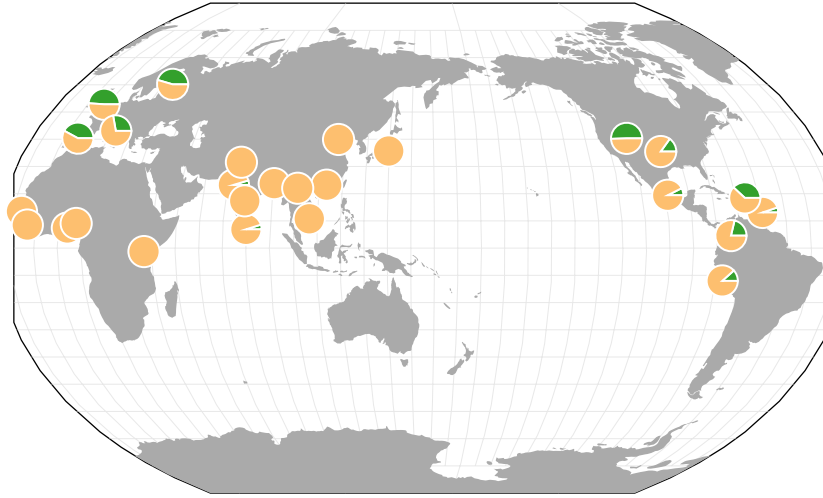

*Frequency Scale = Proportion out of 0.1*  
The pie below represents a minor allele frequency of 0.025

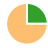

Sample sizes below 30 become increasingly transparent to represent uncertain frequencies, i.e.

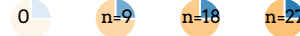

Figure 3 Global distribution of p.C282Y (rs1800562). Allele frequencies are highest in Europe (particularly northern Europe) and parts of north America. Map generated from the Geography of Genetic Variants Browser<sup>1</sup>.

| <b>FreeSurfer 5.3 segmentation<br/>T1</b> | <b>Pauli, 2018<br/>HCP T1 &amp; T2</b>  | <b>Najdenovska, 2018<br/>HCP FODs</b>                 |
|-------------------------------------------|-----------------------------------------|-------------------------------------------------------|
| Amygdala (Amg)                            | Putamen (Pu)                            | Anterior (tA)                                         |
| Hippocampus (Hipp)                        | Caudate (Ca)                            | Ventral anterior (tVA)                                |
| Putamen (Pu)                              | Nucleus accumbens (NAcc)                | Mediodorsal (tMD)                                     |
| Caudate (Ca)                              | Extended amygdala (EA)                  | Ventral-latero-ventral (tVLV)                         |
| Globus pallidus (GP)                      | Substantia nigra pars compacta (SNpc)   | Ventral-latero-dorsal (tVLD)                          |
| Accumbens area (NAcc)                     | Substantia nigra pars reticulata (SNpr) | Central-latero-lateral-posterior-medial-pulvinar (tC) |
| Thalamus (Thal)                           | Red nucleus (RN)                        | Pulvinar (tP)                                         |
| Ventral Diencephalon (VDC)                | Parabrachial pigmented nucleus (PBP)    |                                                       |
|                                           | Hypothalamus (Hyp)                      |                                                       |
|                                           | Mamillary nucleus (MN)                  |                                                       |
|                                           | Subthalamic nucleus (STN)               |                                                       |

*Table 1 Regions of interest (ROIs) labelled using 3 different methods. Column 1) automatic segmentation using FreeSurfer 5.3 applied to each subject's T1 image in atlas space<sup>2</sup>; Column 2) registration of the Pauli atlas of subcortical nuclei to the multispectral atlas<sup>3</sup>; Column 3) registration of the the Najdenovska thalamic nuclei atlas to our data<sup>4</sup>.*

*Males*

| Diagnosis                                                | Total Controls | Total Cases | C282Y Cases | OR       | CI_lower | CI_upper | P          |
|----------------------------------------------------------|----------------|-------------|-------------|----------|----------|----------|------------|
| <b>Abnormalities of Gait and Mobility [R26]</b>          | 219012         | 4557        | 26          | 0.964119 | 0.65175  | 1.4262   | 0.854872   |
| <b>Other Disorders of Nervous System [G90-99]</b>        | 219737         | 3832        | 33          | 1.5081   | 1.06499  | 2.13558  | 0.02063    |
| <b>Parkinson's Disease [G20]</b>                         | 221638         | 1931        | 20          | 1.78188  | 1.13941  | 2.78661  | 0.011341   |
| <b>Essential Tremor [G25]</b>                            | 222688         | 881         | 10          | 1.92304  | 1.02705  | 3.6007   | 0.0410158  |
| <b>Movement Disorders [G20-26]</b>                       | 220636         | 2933        | 31          | 1.8162   | 1.26605  | 2.60542  | 0.00118983 |
| <b>Movement and Other Disorders of the Nervous Sy...</b> | 217030         | 6539        | 61          | 1.63773  | 1.26297  | 2.12371  | 0.00019852 |

*Females*

| Diagnosis                                                | Total Controls | Total Cases | C282Y Cases | OR      | CI_lower | CI_upper | P        |
|----------------------------------------------------------|----------------|-------------|-------------|---------|----------|----------|----------|
| <b>Abnormalities of Gait and Mobility [R26]</b>          | 260493         | 4226        | 31          | 1.16012 | 0.810591 | 1.66038  | 0.41681  |
| <b>Other Disorders of Nervous System [G90-99]</b>        | 260857         | 3862        | 25          | 1.06932 | 0.719118 | 1.59005  | 0.740586 |
| <b>Parkinson's Disease [G20]</b>                         | 263551         | 1168        | 6           | 0.79401 | 0.354918 | 1.77633  | 0.574492 |
| <b>Essential Tremor [G25]</b>                            | 263662         | 1057        | 9           | 1.34698 | 0.696958 | 2.60323  | 0.375601 |
| <b>Movement Disorders [G20-26]</b>                       | 262280         | 2439        | 17          | 1.09684 | 0.678124 | 1.77411  | 0.706349 |
| <b>Movement and Other Disorders of the Nervous Sy...</b> | 258589         | 6130        | 40          | 1.05775 | 0.771525 | 1.45016  | 0.727282 |

Table 2 Regression tables results for associating C282Y homozygote (+/+) cases with diagnoses of different neurological disorders. Models were fit separately for males and females.

## Bibliography

1. Marcus, J. H. & Novembre, J. Visualizing the geography of genetic variants. *Bioinformatics* **33**, 594–595 (2017).
2. Fischl, B. *et al.* Whole brain segmentation: Automated labeling of neuroanatomical structures in the human brain. *Neuron* **33**, 341–355 (2002).
3. Pauli, W. M., Nili, A. N. & Michael Tyszka, J. Data Descriptor: A high-resolution probabilistic in vivo atlas of human subcortical brain nuclei. *Sci. Data* **5**, 1–13 (2018).
4. Najdenovska, E. *et al.* In-vivo probabilistic atlas of human thalamic nuclei based on diffusion-weighted magnetic resonance imaging. *Sci. Data* **5**, 1–11 (2018).
